# Supplementary material for: A randomized double-blinded study assessing the effect of different doses of transnasal dexmedetomidine on the median effective concentration of ropivacaine for a caudal block
Source: Front Med (Lausanne). 2024 Nov 18;11:1481938. doi: 10.3389/fmed.2024.1481938 (PMC11608987; doi:10.3389/fmed.2024.1481938)
Supplement: Supplementary file 1 [file Data_Sheet_1.xlsx]

## Sheet: Table 1、2 、3基线资料
group	age	height	weight	gender	ASA	Sacral canal operation time	operation time	concentration	frequency	effectiveness	Postoperative hospital stay	atropine	ephedrine	SBP（T0）	SBP（T1）	SBP（T2）	SBP（T3）	SBP（T4）	DBP（T0）	DBP（T1）	DBP（T2）	DBP（T3）	DBP（T4）	Heart rate（T0）	Heart rate（T1）	Heart rate（T2）	Heart rate（T3）	Heart rate（T4）
1	40	160	54	0	1	6	60	0.4	1	1	7	0	0	135	131	122	131	123	85	82	82	81	80	75	71	69	70	72
1	32	162	50	0	1	5	25	0.375	1	1	7	0	0	108	110	116	122	113	67	68	70	80	72	80	78	75	78	80
1	28	166	60	0	1	8	20	0.35	1	1	8	0	0	134	125	117	123	120	87	82	73	80	77	83	78	75	79	80
1	47	155	46.5	0	1	5	35	0.325	1	1	7	0	0	118	115	127	132	115	75	73	75	70	77	62	62	61	60	65
1	30	166	67	1	2	6	30	0.3	1	1	5	0	0	129	131	119	128	116	88	80	76	81	71	81	79	74	76	78
1	46	163	57	0	2	7	25	0.275	1	0	10	0	0	121	117	111	125	119	78	74	77	83	75	61	60	58	58	60
1	48	170	76	1	2	8	45	0.3	1	1	9	0	0	125	120	126	132	121	77	73	76	81	76	70	72	72	70	60
1	36	166	57	1	2	6	40	0.275	1	1	8	0	0	129	122	119	125	121	81	75	78	78	81	71	75	73	73	78
1	28	156	52	0	1	5	30	0.25	1	0	8	0	0	130	125	119	127	128	83	82	77	81	82	70	70	67	71	75
1	43	159	58	0	1	8	30	0.275	1	0	10	0	0	105	99	104	115	110	61	59	62	71	70	63	65	62	61	58
1	32	171	66	1	1	5	40	0.3	1	1	10	0	0	119	117	120	125	109	77	76	81	83	64	67	73	72	75	76
1	27	163	47	0	1	5	20	0.275	1	0	7	0	0	107	110	115	108	116	62	64	71	68	71	90	85	84	88	80
1	30	162	54	1	1	5	25	0.3	1	1	9	0	0	122	120	115	124	110	80	78	71	79	78	70	73	78	78	68
1	46	153	45	0	2	4	30	0.275	1	0	18	0	0	100	107	95	111	110	59	65	61	66	66	70	75	70	65	68
1	36	167	64	0	1	10	45	0.3	1	0	12	0	0	140	135	117	131	139	93	89	82	86	90	87	81	82	82	87
1	45	168	65	1	2	7	50	0.325	1	1	5	0	0	143	135	130	141	130	85	82	80	88	84	81	82	80	81	78
1	46	155	50	0	1	5	40	0.3	1	0	6	0	0	135	126	128	132	130	87	75	78	84	71	100	93	95	93	90
1	35	182	85	1	2	8	35	0.325	1	1	12	0	0	130	120	115	117	120	82	74	72	74	75	100	91	90	90	89
1	32	160	48	0	1	4	45	0.3	1	1	14	0	0	110	125	105	107	110	67	58	62	58	64	81	72	71	73	72
1	50	170	69	1	2	7	40	0.275	1	1	4	0	0	120	114	112	109	116	75	72	70	68	73	75	74	71	71	68
1	49	163	70	0	2	10	20	0.25	1	0	7	0	0	136	124	118	112	115	82	79	77	72	74	83	77	73	83	72
1	36	173	62	1	2	6	30	0.275	1	0	12	0	0	120	116	131	133	131	77	79	82	83	82	68	61	63	63	65
1	43	155	55	0	1	5	40	0.3	1	1	13	0	0	138	131	117	118	116	85	82	77	79	77	80	77	78	76	78
1	34	158	65	0	1	6	25	0.275	1	1	8	0	0	117	115	118	114	113	75	81	77	75	77	77	75	74	73	74
1	26	168	65	1	1	5	50	0.25	1	1	7	0	0	120	124	117	116	120	79	79	77	75	77	80	78	77	76	80
1	29	160	54	0	1	6	35	0.225	1	0	8	0	0	120	117	117	118	119	81	82	80	81	82	81	81	80	82	83
1	32	178	80	1	1	7	20	0.25	1	0	6	0	0	125	121	116	116	115	82	83	81	79	79	75	73	73	72	78
1	41	168	78	1	2	7	35	0.275	1	1	7	0	0	141	134	127	138	132	90	88	80	89	86	78	77	75	63	61
1	30	173	60	1	1	6	20	0.25	1	0	7	0	0	118	115	117	116	110	70	77	74	75	72	75	74	76	72	76
1	35	170	54	1	1	7	35	0.275	1	1	8	0	0	135	128	123	121	119	84	79	77	76	76	88	81	78	84	74
2	45	156	59	0	1	8	20	0.4	1	1	8	0	0	120	113	121	115	111	80	79	78	72	74	92	87	83	81	73
2	33	157	44	0	1	5	50	0.375	1	1	7	0	0	109	106	110	106	99	75	71	68	65	59	78	77	72	72	69
2	31	160	50	0	1	5	35	0.35	1	1	9	0	0	107	113	117	115	100	75	71	65	72	60	75	77	78	74	74
2	30	170	65	1	2	7	20	0.325	1	1	11	0	0	118	115	124	118	109	73	72	79	77	68	76	75	77	73	66
2	26	152	44	0	2	4	30	0.3	1	1	6	0	0	118	129	131	124	105	74	72	80	81	63	75	81	77	74	67
2	46	180	75	1	2	8	40	0.275	1	0	7	0	0	121	115	112	110	99	79	77	73	67	58	78	75	71	63	65
2	49	168	67	1	1	6	25	0.3	1	1	8	1	0	130	125	110	99	90	87	81	76	64	52	70	68	62	55	51
2	36	169	64	1	2	5	50	0.275	1	0	14	0	0	139	135	125	119	115	90	88	76	78	73	78	75	73	77	72
2	43	166	60	0	1	7	25	0.3	1	1	7	0	0	130	117	128	123	124	85	80	85	77	81	81	78	75	74	68
2	34	158	50	0	1	5	20	0.275	1	1	7	0	0	105	111	121	113	102	67	68	78	70	65	88	85	78	78	75
2	41	167	50	0	1	5	25	0.25	1	1	4	0	0	145	134	131	123	117	90	82	81	78	77	78	76	75	71	66
2	25	170	62	1	2	6	25	0.225	1	0	6	0	0	117	122	125	117	120	70	67	83	79	77	81	82	83	83	75
2	36	159	53	0	1	6	25	0.25	1	0	12	0	0	102	106	104	104	99	67	66	69	62	57	66	68	66	59	58
2	35	165	75	1	1	10	50	0.275	1	1	16	0	0	107	110	117	113	110	68	68	72	72	71	70	73	71	63	62
2	41	165	52	0	1	6	35	0.25	1	0	2	0	0	121	125	121	117	117	77	67	72	72	72	69	65	63	63	62
2	33	160	47	0	1	4	40	0.275	1	0	8	0	0	107	111	104	95	93	68	65	65	60	58	75	73	70	60	61
2	37	155	59	0	1	8	10	0.3	1	1	8	0	0	135	124	113	107	104	80	78	72	68	65	58	61	57	59	54
2	33	170	80	1	2	7	35	0.275	1	1	6	0	0	131	133	127	121	122	84	82	80	79	77	68	63	62	62	60
2	30	160	45	0	1	4	25	0.25	1	0	7	0	0	136	123	121	115	107	84	80	79	78	71	78	78	77	78	75
2	42	161	56	1	1	5	45	0.275	1	1	3	0	0	127	125	115	112	113	81	76	77	70	71	80	75	74	76	75
2	43	175	72	1	1	6	40	0.25	1	1	6	0	0	133	128	117	120	118	85	76	74	77	78	88	81	80	72	68
2	45	164	58	1	2	6	40	0.225	1	0	7	0	0	135	118	117	116	119	82	74	78	71	68	88	78	80	78	75
2	48	160	45	0	2	5	40	0.25	1	0	6	0	0	138	125	120	122	118	92	85	77	78	78	82	78	77	73	74
2	30	176	80	1	2	7	40	0.275	1	1	7	0	0	140	132	125	121	123	93	83	80	81	78	76	78	74	76	73
2	45	157	51	0	1	6	25	0.25	1	0	7	0	0	105	111	105	100	96	66	72	66	57	58	66	71	66	61	58
2	47	168	57	0	2	7	70	0.275	1	1	17	0	0	110	119	110	113	109	70	80	70	68	68	81	73	74	74	74
2	47	164	54	0	2	6	20	0.25	1	1	12	0	0	120	121	114	116	110	75	79	72	66	65	78	72	75	74	75
2	35	170	70	1	1	7	45	0.225	1	0	12	0	0	139	129	118	120	125	82	83	72	77	74	81	81	82	83	81
2	45	165	59	0	1	7	30	0.25	1	1	6	0	0	120	115	113	117	112	77	73	68	73	66	86	82	76	77	76
2	31	150	47	0	1	5	30	0.225	1	0	10	0	0	115	109	108	110	104	76	69	64	66	56	78	76	72	67	60
3	45	157	52	0	1	6	50	0.4	1	1	6	0	0	123	125	122	117	115	78	81	75	72	68	78	72	66	64	68
3	33	160	59	0	1	8	50	0.375	1	1	6	0	0	125	128	121	118	113	79	82	76	71	70	70	69	65	57	55
3	31	162	50	0	1	5	60	0.35	1	1	12	0	0	117	113	110	106	103	75	74	69	64	59	75	76	73	57	62
3	30	168	50	1	1	4	20	0.325	1	1	5	0	0	125	119	115	112	109	82	83	91	85	78	89	82	72	71	66
3	23	173	54.5	1	2	5	25	0.3	1	1	12	0	0	108	113	107	104	95	67	72	70	66	58	87	88	81	78	72
3	35	155	58	0	2	7	35	0.275	1	1	6	0	0	120	117	114	111	108	75	77	74	71	64	73	71	69	67	64
3	47	171	68	1	2	7	40	0.25	1	1	11	0	0	121	123	116	114	109	78	80	77	72	69	72	72	69	57	53
3	46	162	57	0	1	6	35	0.225	1	0	6	0	0	135	122	120	113	109	83	79	77	72	66	95	87	85	77	68
3	43	150	47	0	2	6	25	0.25	1	1	11	0	0	105	109	107	102	95	68	68	67	60	55	88	85	77	71	67
3	24	158	55	0	1	6	40	0.225	1	1	8	0	0	135	129	125	119	113	85	83	81	77	67	72	79	71	58	55
3	41	170	60	1	2	5	45	0.2	1	1	7	0	0	127	122	117	109	108	82	82	79	70	67	78	77	70	64	63
3	42	168	58	0	1	6	30	0.175	1	0	14	0	0	110	115	109	98	95	67	71	66	59	55	91	88	77	79	76
3	28	164	78	1	1	9	50	0.2	1	0	13	0	0	128	124	125	118	109	83	80	81	72	65	68	70	73	61	56
3	27	156	49	0	1	5	55	0.225	1	0	10	0	0	116	117	113	109	105	77	75	73	70	63	77	73	70	64	69
3	29	156	46	0	1	5	40	0.25	1	1	5	0	0	120	123	118	111	106	80	84	72	70	66	68	71	67	61	53
3	23	185	69	1	1	6	40	0.225	1	0	12	0	0	127	118	122	115	109	85	80	78	71	68	68	72	68	57	56
3	22	163	65	1	1	6	25	0.25	1	1	8	0	0	117	115	112	114	110	75	73	75	72	70	77	81	77	63	59
3	47	158	57	0	2	7	40	0.225	1	1	8	0	0	125	120	119	118	112	78	80	79	77	68	75	74	73	66	63
3	33	176	63	1	1	4	35	0.2	1	0	5	0	0	118	113	116	111	107	74	70	72	72	65	88	81	85	75	74
3	43	156	59	0	2	8	40	0.225	1	1	8	0	0	118	118	115	109	104	67	66	66	61	60	80	85	75	75	70
3	31	163	55	0	1	6	10	0.2	1	0	6	0	0	125	115	116	113	116	80	75	72	73	72	79	78	74	60	63
3	32	180	80	1	1	8	40	0.225	1	1	5	1	0	135	131	115	109	103	87	83	73	65	57	72	70	66	55	51
3	35	175	85	1	1	9	35	0.2	1	0	13	0	0	141	130	126	121	118	90	84	81	75	67	66	61	59	61	58
3	33	168	51	1	1	5	35	0.225	1	1	6	0	0	128	121	119	121	116	82	80	76	78	70	65	67	64	68	67
3	48	156	58	0	2	7	40	0.2	1	0	7	0	0	113	113	112	112	114	70	71	72	70	70	77	71	62	63	62
3	49	175	88	1	2	12	50	0.225	1	0	7	0	0	138	131	123	115	108	84	80	78	72	67	88	81	78	77	73
3	46	156	55	0	2	7	40	0.25	1	1	9	0	0	110	113	112	108	105	67	68	66	62	54	76	75	65	69	67
3	44	165	55	1	2	5	50	0.225	1	1	9	1	1	105	109	106	97	88	63	65	63	56	58	71	68	65	55	50
3	29	154	47	0	1	5	25	0.2	1	0	11	0	0	105	102	103	100	92	68	61	59	54	48	65	62	59	63	54
3	37	180	70	0	1	7	60	0.225	1	1	8	0	0	122	109	108	107	105	77	71	70	67	63	77	62	63	61	63
	1:IN-NS
	2:IN-DEX1
	3:IN-DEX2
